# Supplementary material for: Application of Native Hapten Agar Gel Immunodiffusion Assay for Differentiating Brucella-Infected Cattle from Brucella abortus A19- Vaccinated Cattle
Source: Research Square preprint supplement (doi:10.21203/rs.3.rs-7623385/v1), 2025-11-05
Supplement: Supplementary file 1 [file b662c75c72538ddc7ea6f09b.pdf]

**The result of NH-AGID for Brucellosis positive serum samples from *positive serum A19*-vaccinated cattle from a cattle farm**

| Numerical order | The number of the cow | The result of RBT | The result of SAT | The result of NH-AGID |
|-----------------|-----------------------|-------------------|-------------------|-----------------------|
| 1               | 104274                | +                 | 1: 6400           | -                     |
| 2               | 1435                  | +                 | 1: 400            | -                     |
| 3               | 150027                | +                 | 1: 6400           | -                     |
| 4               | 150048                | +                 | 1: 6400           | -                     |
| 5               | 150058                | +                 | 1: 6400           | -                     |
| 6               | 150075                | +                 | 1: 800            | LPS                   |
| 7               | 150110                | +                 | 1: 6400           | LPS                   |
| 8               | 150235                | +                 | 1: 800            | -                     |
| 9               | 203156                | +                 | 1: 6400           | -                     |
| 10              | 203163                | +                 | 1: 400            | -                     |
| 11              | 204013                | +                 | 1: 6400           | -                     |
| 12              | 204016                | +                 | 1: 800            | -                     |
| 13              | 204125                | +                 | 1: 6400           | -                     |
| 14              | 216013                | +                 | 1: 800            | -                     |
| 15              | 216036                | +                 | 1: 6400           | -                     |
| 16              | 216056                | +                 | 1: 6400           | -                     |
| 17              | 216090                | +                 | 1: 800            | -                     |
| 18              | 216105                | +                 | 1: 6400           | NH+LPS                |
| 19              | 216145                | +                 | 1: 400            | LPS                   |
| 20              | 216265                | +                 | 1: 6400           | LPS                   |
| 21              | 217016                | +                 | 1: 800            | LPS                   |
| 22              | 217042                | +                 | 1: 6400           | LPS                   |
| 23              | 217081                | +                 | 1: 800            | LPS                   |
| 24              | 217114                | +                 | 1: 800            | LPS                   |
| 25              | 217143                | +                 | 1: 800            | -                     |
| 26              | 217169                | +                 | 1: 6400           | LPS                   |
| 27              | 217171                | +                 | 1: 800            | LPS                   |
| 28              | 217175                | +                 | 1: 6400           | NH+LPS                |
| 29              | 217179                | +                 | 1: 400            | NH+LPS                |
| 30              | 2178                  | +                 | 1: 6400           | NH+LPS                |
| 31              | 218014                | +                 | 1: 6400           | LPS                   |
| 32              | 219382                | +                 | 1: 6400           | LPS                   |
| 33              | 220149                | +                 | 1: 400            | -                     |
| 34              | 220341                | +                 | 1: 400            | -                     |

|    |        |   |         |        |
|----|--------|---|---------|--------|
| 35 | 220342 | + | 1: 800  | -      |
| 36 | 220358 | + | 1: 800  | -      |
| 37 | 220364 | + | 1: 800  | -      |
| 38 | 220367 | + | 1: 800  | -      |
| 39 | 220373 | + | 1: 800  | -      |
| 40 | 220377 | + | 1: 400  | -      |
| 41 | 220379 | + | 1: 800  | -      |
| 42 | 220380 | + | 1: 800  | -      |
| 43 | 220381 | + | 1: 800  | LPS    |
| 44 | 220382 | + | 1: 800  | LPS    |
| 45 | 220385 | + | 1: 400  | LPS    |
| 46 | 220386 | + | 1: 800  | LPS    |
| 47 | 220387 | + | 1: 800  | LPS    |
| 48 | 220391 | + | 1: 400  | LPS    |
| 49 | 220393 | + | 1: 3200 | NH+LPS |
| 50 | 220395 | + | 1: 800  | NH+LPS |
| 51 | 220397 | + | 1: 6400 | NH+LPS |
| 52 | 220401 | + | 1: 400  | LPS    |
| 53 | 220402 | + | 1: 400  | LPS    |
| 54 | 220403 | + | 1: 400  | -      |
| 55 | 220409 | + | 1: 800  | -      |
| 56 | 220410 | + | 1: 6400 | -      |
| 57 | 220419 | + | 1: 400  | -      |
| 58 | 220423 | + | 1: 800  | NH+LPS |
| 59 | 220425 | + | 1: 800  | LPS    |
| 60 | 220429 | + | 1: 400  | LPS    |
| 61 | 220430 | + | 1: 800  | -      |
| 62 | 220437 | + | 1: 6400 | -      |
| 63 | 23     | + | 1: 800  | LPS    |
| 64 | 3062   | + | 1: 3200 | LPS    |
| 65 | 3203   | + | 1: 3200 | LPS    |
| 66 | 3228   | + | 1: 6400 | LPS    |
| 67 | 4017   | + | 1: 3200 | LPS    |
| 68 | 4105   | + | 1: 800  | LPS    |
| 69 | 4108   | + | 1: 3200 | LPS    |
| 70 | 4123   | + | 1: 800  | -      |
| 71 | 4136   | + | 1: 200  | LPS    |
| 72 | 4146   | + | 1: 800  | LPS    |
| 73 | 4158   | + | 1: 3200 | LPS    |
| 74 | 4211   | + | 1: 3200 | LPS    |
| 75 | 4233   | + | 1: 800  | -      |

|    |      |   |         |     |
|----|------|---|---------|-----|
| 76 | 4254 | + | 1: 400  | -   |
| 77 | 4257 | + | 1: 3200 | -   |
| 78 | 8163 | + | 1: 3200 | LPS |

### The specific primer sequences of AMOS-PCR

| Primer Designation | sequences of forward primer (5'-3') | sequences of Reverse primer (5'-3') | Size of amplified fragment (bp) |
|--------------------|-------------------------------------|-------------------------------------|---------------------------------|
| A1                 | GACGAACGGAATTTTCCAATCCC             | TGCCGATCACTTAAGG<br>GCCTTCAT        | 498                             |
| A3                 | GCGCAGCGTTGCGGCAATTG                |                                     | 731                             |
| M                  | AAATCGCGTCCTTGCTGGTCTGA             |                                     | 1742                            |
